# Supplementary material for: Strain engineered pyrochlore at high pressure
Source: PubMed Central journal article supplement (PMC5440404; doi:10.1038/s41598-017-02637-9), 2017-05-22
Supplement: 41598_2017_2637_MOESM1_ESM.pdf [file 41598_2017_2637_MOESM1_ESM.pdf]

# Strain engineered pyrochlore at high pressure

Dylan R. Rittman<sup>1,\*</sup>, Katlyn M. Turner<sup>1</sup>, Sulgiye Park<sup>1</sup>, Antonio F. Fuentes<sup>2</sup>, Changyong Park<sup>3</sup>,  
Rodney C. Ewing<sup>1</sup>, Wendy L. Mao<sup>1,4</sup>

<sup>1</sup> Department of Geological Sciences, Stanford University, Stanford, California 94305, U.S.A.

<sup>2</sup> Cinvestav Unidad Saltillo, Apartado Postal 663, 25000 Saltillo, Coahuila, Mexico

<sup>3</sup> High Pressure Collaborative Access Team, Geophysical Laboratory, Carnegie Institution of Washington, Argonne, IL 60439, U.S.A.

<sup>4</sup> Stanford Institute for Materials and Energy Sciences, SLAC National Accelerator Laboratory, Menlo Park, California 94025, U.S.A.

\* Corresponding author: (Dylan R. Rittman) Electronic mail: [drittman@stanford.edu](mailto:drittman@stanford.edu)

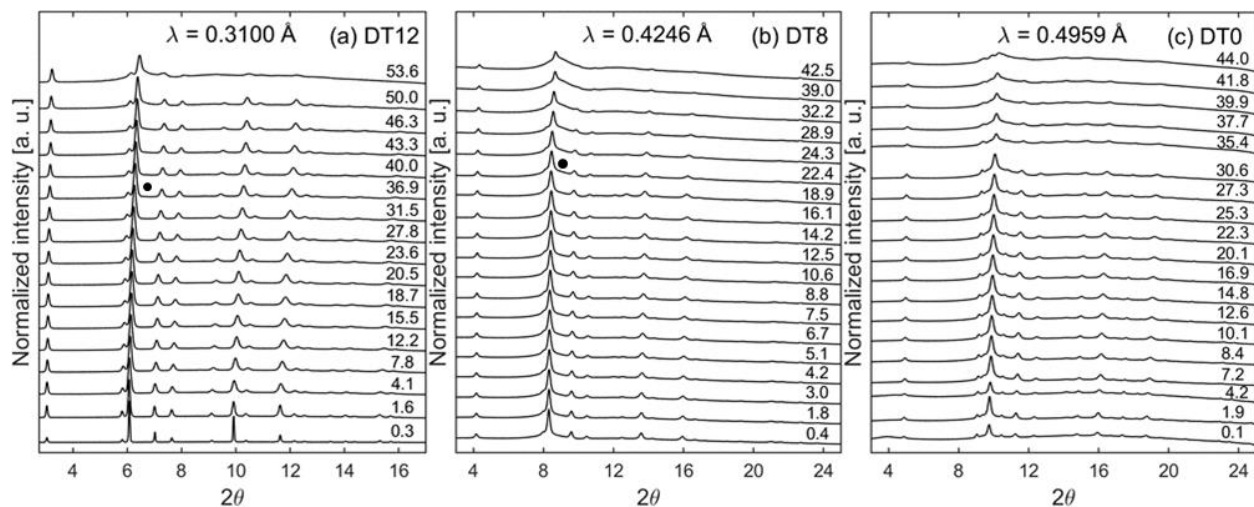

**Supplementary Fig. S1. Complete set of  $\text{Dy}_2\text{Ti}_2\text{O}_7$  X-ray diffraction data.** This is provided in addition to the selected X-ray diffraction patterns shown in Fig. 2. Black dots indicate the onset of the transformation.

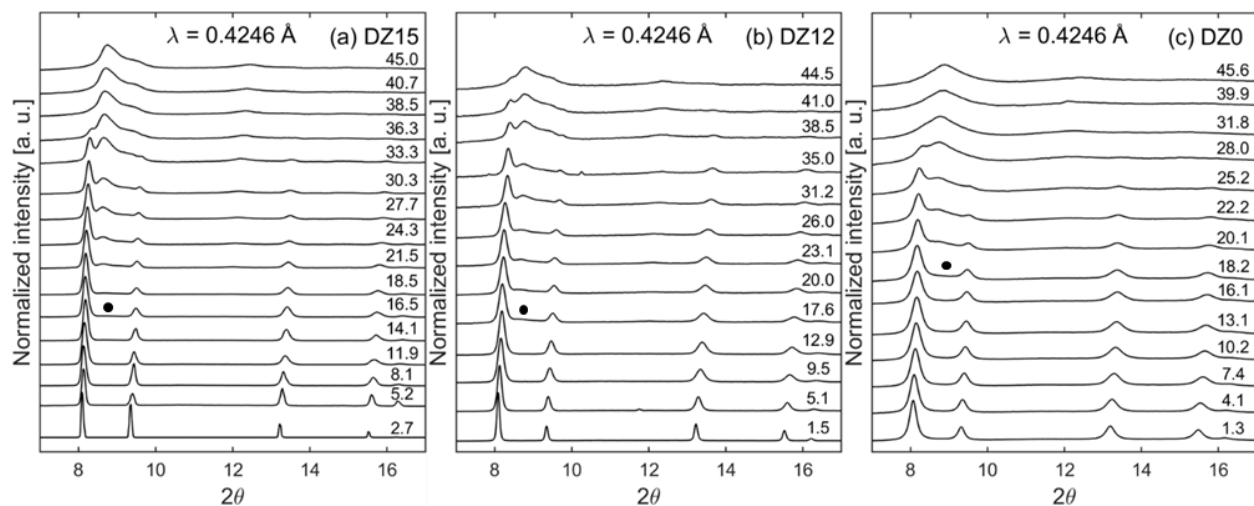

**Supplementary Fig. S2. Complete set of  $\text{Dy}_2\text{Zr}_2\text{O}_7$  X-ray diffraction data.** This is provided in addition to the selected X-ray diffraction patterns shown in Fig. 3. Top: full two-theta range of XRD data. Black dots indicate the onset of the transformation.

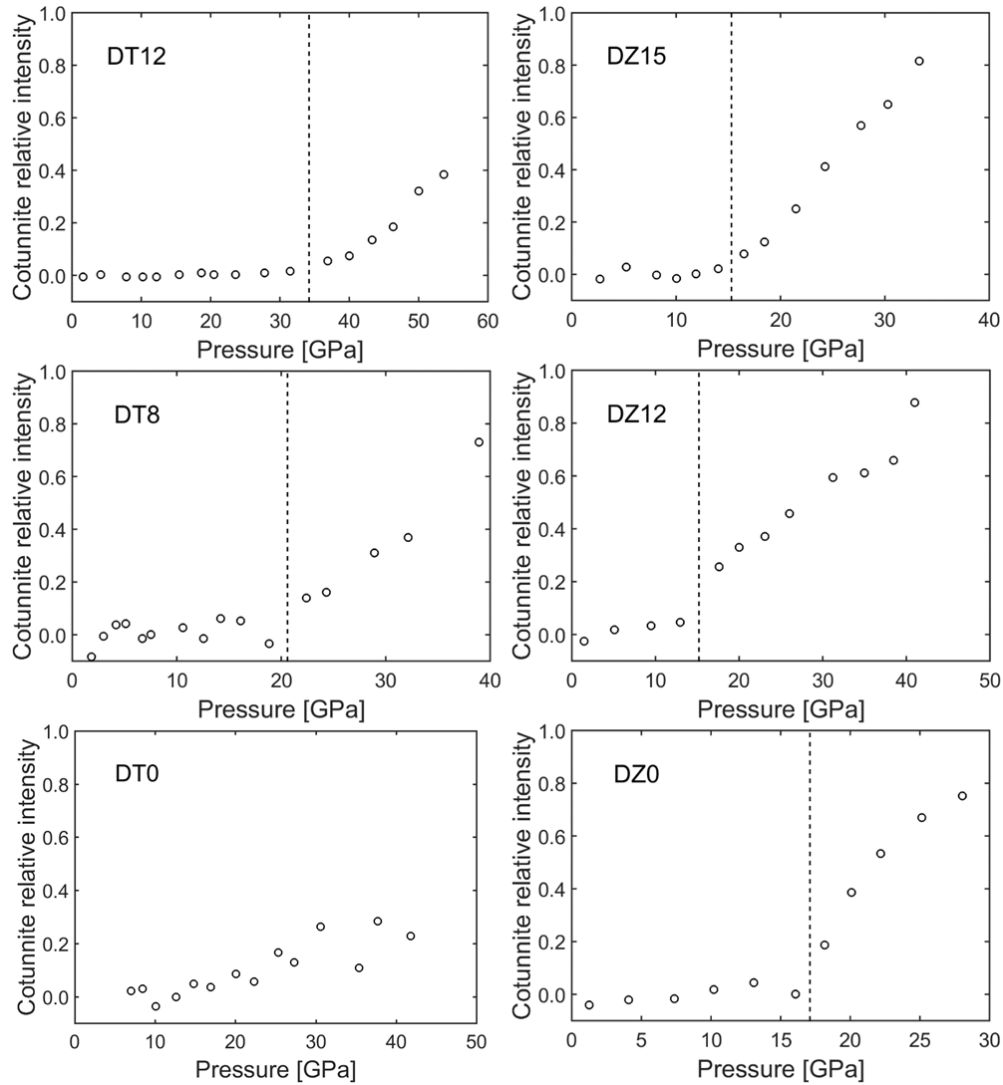

**Supplementary Fig. S3. Quantitative cotunnite phase fraction as a function of pressure.**

These data provide a quantitative basis for the onset pressures of the phase transformation quoted in Table I. Pyrochlore intensity is defined as the total peak area in the (222) and (004) diffraction maxima. Cotunnite intensity is defined as the total peak area between the (222) and (004) pyrochlore diffraction maxima, after microstrain (based on low-pressure diffraction) has been subtracted. We note that these values may not represent the absolute phase fraction of cotunnite in the sample; but they reflect that an increase in cotunnite phase fraction begins to occur after onset pressures of the phase transformation quoted in Table I.

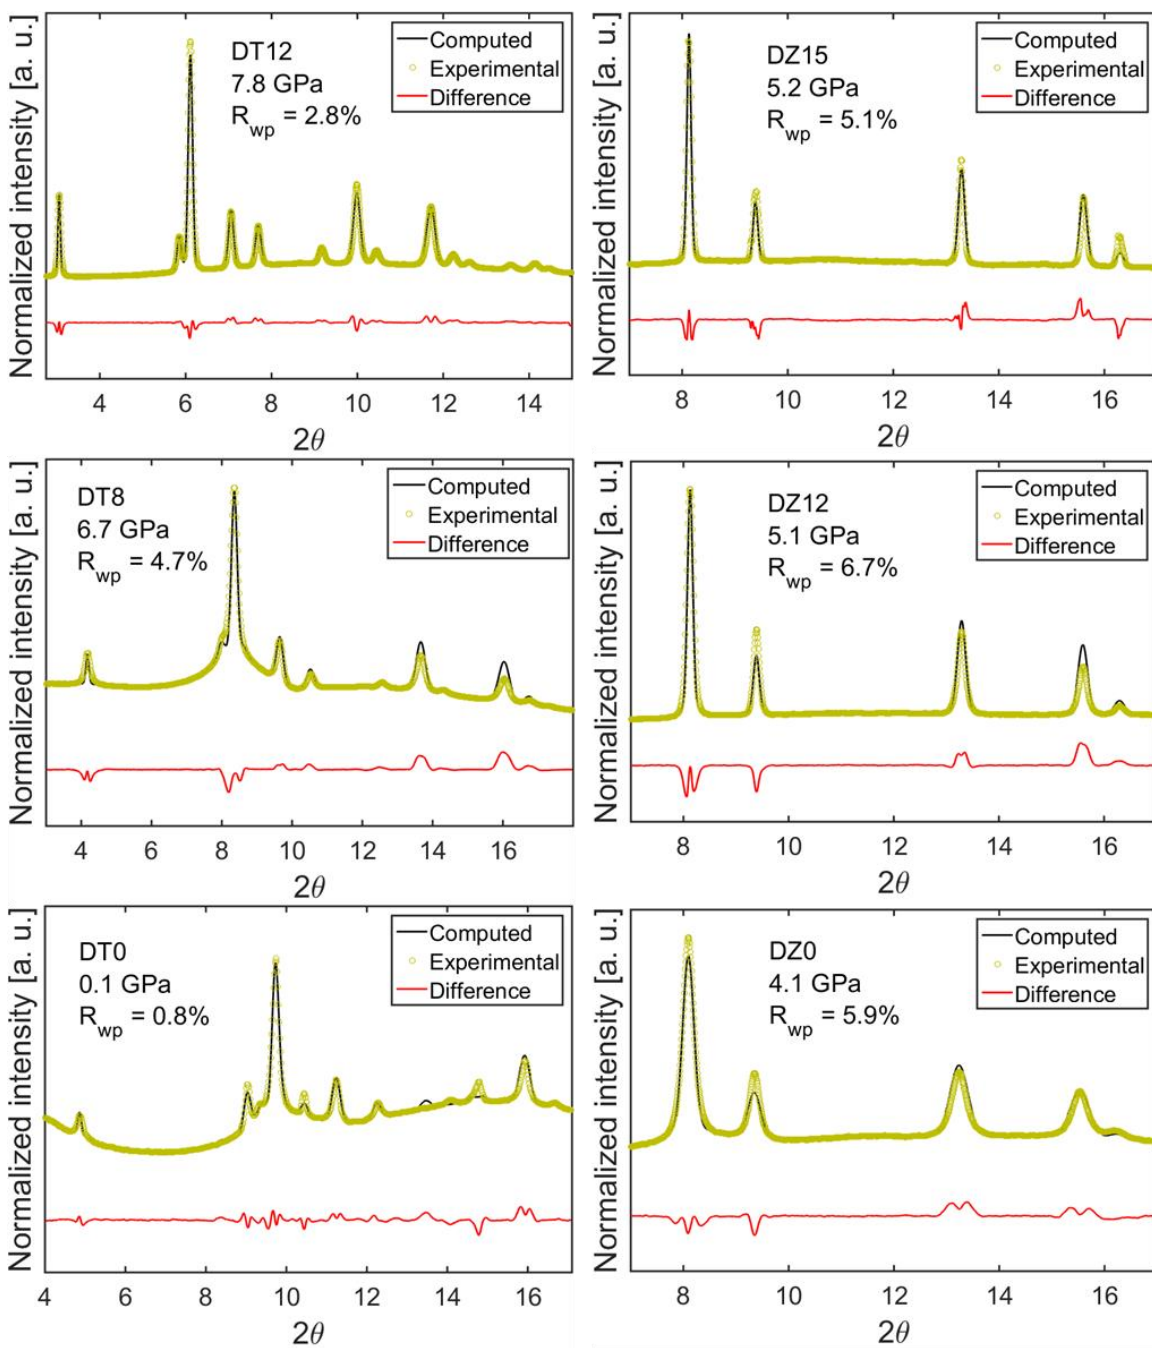

**Supplementary Fig. S4. Representative Rietveld refinements for each sample.** Rietveld refinement was used to calculate the unit cell volumes of the pyrochlore and defect-fluorite structures, which were determined through the refinement of the unit cell parameter. Deviations from theoretical diffraction intensities do not affect this value.

**Supplementary Table SI. Data from Fig. 4.** Numerical values of the pressure-volume data plotted in Fig. 4.

| <b>DT12</b>           |                               |                              | <b>DT8</b>            |                               |                              | <b>DT0</b>            |                               |                              |
|-----------------------|-------------------------------|------------------------------|-----------------------|-------------------------------|------------------------------|-----------------------|-------------------------------|------------------------------|
| <b>Pressure [GPa]</b> | <b>Volume [Å<sup>3</sup>]</b> | <b>Error [Å<sup>3</sup>]</b> | <b>Pressure [GPa]</b> | <b>Volume [Å<sup>3</sup>]</b> | <b>Error [Å<sup>3</sup>]</b> | <b>Pressure [GPa]</b> | <b>Volume [Å<sup>3</sup>]</b> | <b>Error [Å<sup>3</sup>]</b> |
| 1.6                   | 1044.10                       | 0.72                         | 1.8                   | 1045.08                       | 3.60                         | 0.1                   | 1046.07                       | 3.46                         |
| 4.1                   | 1035.94                       | 0.61                         | 4.2                   | 1036.83                       | 2.70                         | 1.9                   | 1037.79                       | 2.82                         |
| 7.8                   | 1022.23                       | 0.74                         | 6.7                   | 1028.69                       | 3.27                         | 4.2                   | 1025.31                       | 2.90                         |
| 12.2                  | 1009.88                       | 0.89                         | 8.8                   | 1018.03                       | 2.51                         | 7.0                   | 1011.46                       | 2.94                         |
| 15.5                  | 999.75                        | 0.91                         | 10.6                  | 1012.99                       | 3.18                         | 8.4                   | 1005.21                       | 2.30                         |
| 18.7                  | 991.68                        | 0.99                         | 12.5                  | 1005.60                       | 2.18                         | 10.1                  | 999.38                        | 2.24                         |
| 20.5                  | 986.23                        | 0.79                         | 14.2                  | 1003.60                       | 2.28                         | 12.6                  | 991.87                        | 2.04                         |
|                       |                               |                              | 16.1                  | 997.51                        | 2.78                         |                       |                               |                              |

| <b>DZ15</b>           |                               |                              | <b>DZ12</b>           |                               |                              | <b>DZ0</b>            |                               |                              |
|-----------------------|-------------------------------|------------------------------|-----------------------|-------------------------------|------------------------------|-----------------------|-------------------------------|------------------------------|
| <b>Pressure [GPa]</b> | <b>Volume [Å<sup>3</sup>]</b> | <b>Error [Å<sup>3</sup>]</b> | <b>Pressure [GPa]</b> | <b>Volume [Å<sup>3</sup>]</b> | <b>Error [Å<sup>3</sup>]</b> | <b>Pressure [GPa]</b> | <b>Volume [Å<sup>3</sup>]</b> | <b>Error [Å<sup>3</sup>]</b> |
| 2.7                   | 141.49                        | 0.27                         | 1.5                   | 141.67                        | 0.03                         | 1.3                   | 143.00                        | 0.19                         |
| 5.2                   | 139.56                        | 0.17                         | 5.1                   | 139.69                        | 0.08                         | 4.1                   | 141.69                        | 0.55                         |
| 8.1                   | 138.75                        | 0.65                         | 9.5                   | 138.02                        | 0.20                         | 7.4                   | 140.06                        | 0.80                         |
| 11.9                  | 137.65                        | 0.41                         | 12.9                  | 136.60                        | 0.34                         | 10.2                  | 138.63                        | 0.59                         |
| 14.1                  | 136.36                        | 0.33                         | 17.6                  | 135.41                        | 0.63                         | 13.1                  | 137.97                        | 0.96                         |
| 16.5                  | 135.96                        | 0.69                         | 20.0                  | 134.01                        | 0.69                         | 16.1                  | 137.32                        | 1.01                         |
| 18.5                  | 135.52                        | 0.76                         |                       |                               |                              | 18.2                  | 137.02                        | 0.86                         |
| 21.5                  | 134.79                        | 0.78                         |                       |                               |                              | 20.1                  | 135.94                        | 1.11                         |

**Supplementary Table SII. Data from Fig. 6.** Numerical values of the Raman intensity ratio data and its pressure derivative data plotted in Fig. 6.

| DT12           |                 |            | DT8            |                 |            | DT0            |                 |            |
|----------------|-----------------|------------|----------------|-----------------|------------|----------------|-----------------|------------|
| Pressure [GPa] | Intensity Ratio | Derivative | Pressure [GPa] | Intensity Ratio | Derivative | Pressure [GPa] | Intensity Ratio | Derivative |
| 0.2            | 0.0759          | -0.0075    | 1.1            | 0.3518          | -0.0755    | 1.8            | 0.8385          | 0.0123     |
| 1.4            | 0.0670          | -0.0028    | 2.2            | 0.2672          | -0.0314    | 3.2            | 0.8560          | 0.0182     |
| 3.0            | 0.0699          | 0.0010     | 3.5            | 0.2832          | 0.0001     | 4.4            | 0.8860          | 0.0091     |
| 4.4            | 0.0701          | -0.0011    | 4.5            | 0.2704          | -0.0154    | 5.5            | 0.8797          | -0.0019    |
| 5.5            | 0.0675          | -0.0018    | 5.8            | 0.2464          | -0.0127    | 7.1            | 0.8828          | 0.0014     |
| 7.2            | 0.0653          | -0.0008    | 6.8            | 0.2400          | -0.0102    | 8.9            | 0.8844          | 0.0098     |
| 8.7            | 0.0649          | 0.0011     | 7.7            | 0.2273          | -0.0022    | 10.2           | 0.9082          | 0.0199     |
| 10.4           | 0.0691          | -0.0012    | 9.5            | 0.2432          | -0.0016    | 12.5           | 0.9556          | 0.0033     |
| 11.7           | 0.0630          | -0.0013    | 11.1           | 0.2225          | -0.0076    | 13.8           | 0.9366          | -0.0014    |
| 13.1           | 0.0658          | 0.0023     | 12.3           | 0.2193          | -0.0060    | 15.3           | 0.9540          | 0.0264     |
| 15.6           | 0.0721          | -0.0002    | 13.7           | 0.2065          | -0.0052    | 16.5           | 1.0049          | 0.0227     |
| 17.7           | 0.0677          | 0.0018     | 15.0           | 0.2049          | 0.0014     | 18.9           | 1.0145          | 0.0069     |
| 18.5           | 0.0771          | -0.0002    | 16.6           | 0.2113          | 0.0052     | 21.4           | 1.0395          | 0.0350     |
| 21.0           | 0.0596          | -0.0018    | 17.6           | 0.2177          | 0.0056     | 22.5           | 1.1069          | 0.0275     |
| 24.0           | 0.0696          | 0.0022     | 19.3           | 0.2257          | 0.0058     | 23.7           | 1.1011          | 0.0057     |
| 26.0           | 0.0717          | 0.0010     | 21.6           | 0.2416          | 0.0046     | 25.0           | 1.1226          | 0.0205     |
| 28.1           | 0.0736          | 0.0023     | 26.6           | 0.2528          | 0.0051     | 26.3           | 1.1555          | 0.0102     |
| 30.2           | 0.0814          | -0.0001    | 28.8           | 0.2704          | 0.0108     | 27.9           | 1.1492          | 0.0092     |
| 31.8           | 0.0754          | 0.0014     | 30.1           | 0.2885          | 0.0179     | 29.9           | 1.1926          | 0.0151     |
| 35.6           | 0.1014          | 0.0127     | 31.8           | 0.3248          | 0.0179     | 32.5           | 1.2132          | 0.0024     |
| 38.1           | 0.1484          | 0.0270     | 34.6           | 0.3627          | 0.0320     | 34.1           | 1.2085          | 0.0265     |
| 41.2           | 0.2578          | 0.0284     | 37.0           | 0.4841          | 0.0423     | 35.8           | 1.3058          | 0.0237     |
| 43.8           | 0.3149          | 0.0541     | 38.9           | 0.5520          | 0.0802     | 38.9           | 1.2794          | -0.0010    |
| 45.4           | 0.4529          | 0.0978     | 40.6           | 0.7602          | 0.0851     | 40.9           | 1.2925          | 0.0530     |
| 47.5           | 0.6780          | 0.2766     | 42.4           | 0.8406          | 0.0319     | 42.7           | 1.4767          | 0.0009     |
| 51.0           | 2.2472          | 0.4886     | 44.6           | 0.8841          | 0.1775     | 43.9           | 1.3652          | 0.0146     |
|                |                 |            | 47.4           | 1.8258          | 0.3736     | 45.5           | 1.5645          | 0.1007     |
|                |                 |            |                |                 |            | 51.8           | 2.0387          | 0.1138     |
